# Supplementary material for: Allosteric modulation of the GTPase activity of a bacterial LRRK2 homolog by conformation-specific Nanobodies
Source: PubMed Central journal article supplement — Biochem J. 2020 Apr 2;477(7):1203–18. doi: 10.1042/BCJ20190843 (PMC7135905; doi:10.1042/bcj20190843), 2020-04-02
Supplement: BCJ-477-1203-s1.pdf [file BCJ-477-1203-s1.pdf]

# **Supplementary Material**

## **Allosteric modulation of the GTPase activity of a bacterial LRRK2 homologue by conformation-specific Nanobodies**

Margaux Leemans, Christian Galicia, Egon Deyaert, Elise Daems, Linda Krause, Jone Paesmans, Els Pardon, Jan Steyaert, Arjan Kortholt, Frank Sobott, Dagmar Klostermeier, Wim Versées

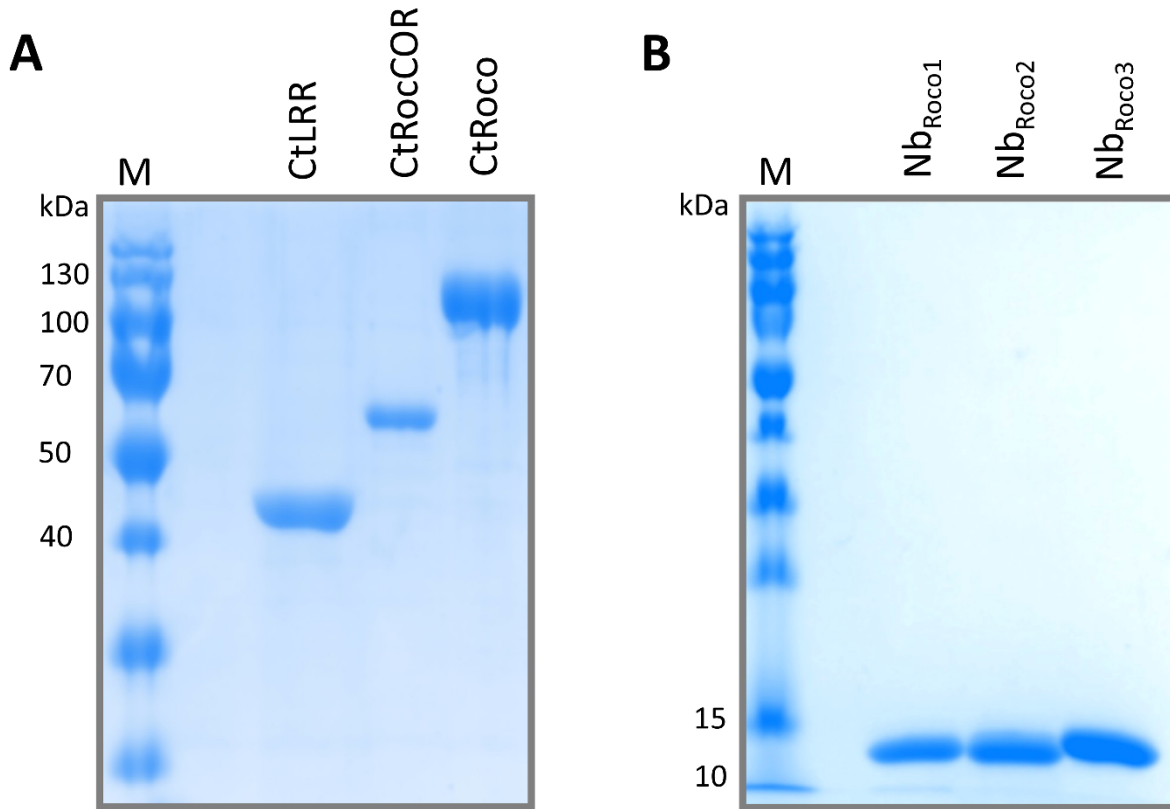

**Supplementary Figure S1. Purity of proteins used in this study.** (A) SDS-PAGE after purification of CtRoco and its RocCOR (CtRocCOR) and LRR (CtLRR) domain constructs. 15  $\mu$ g of each protein has been loaded on gel. (B) SDS-PAGE after purification of Nb<sub>Roco1</sub> (Nb6946), Nb<sub>Roco2</sub> (Nb8175) and Nb<sub>Roco3</sub> (Nb9221). 15  $\mu$ g of each protein has been loaded on gel. M: PageRuler Prestained Protein Ladder.

```

                20           40           60           80
NbRoco1 QVQLQESGGGLVQAGGSLRLSCAASGLTFSTYTMGWFRQAPGKEREFVAAIRWSGTSTYYQDHA80DSVKGRFTISRDN80AKN
NbRoco2 QVQLQESGGGLVQPGGSLRLSCAASGKLLSINVMGWYRQAPGKQRELVASIT76TGGRINY----ADSVKGRFTISRDN76AKN
NbRoco3 QVQLQESGGGLVQPGGSLRLSCTASGSIFFVNAMGWYRQAPGKQRELVA76MIRDDSTDY----GDSVKGRFTISRDSG76KK

                100          120
NbRoco1 TVY137LQMNSLKPEDTAVYYCAASRLRAGVKAPSEYD137WGQGTQVTVSSHHHHHHEPEA
NbRoco2 TVY130LQMNSLKPEDTAVYYCNADGIAGLY--QNDHWGQGTQVTVSSHHHHHHEPEA
NbRoco3 TVY130LEMNSLKPEDTAVYYCIA130DGVLFDRK--PFTSWGQGTQVTVSSHHHHHHEPEA

```

**Supplementary Figure S2. Sequence alignment of Nb<sub>Roco1</sub> (Nb6946), Nb<sub>Roco2</sub> (Nb8175) and Nb<sub>Roco3</sub> (Nb9221). The CDR regions (CDR1-3) are indicated.**

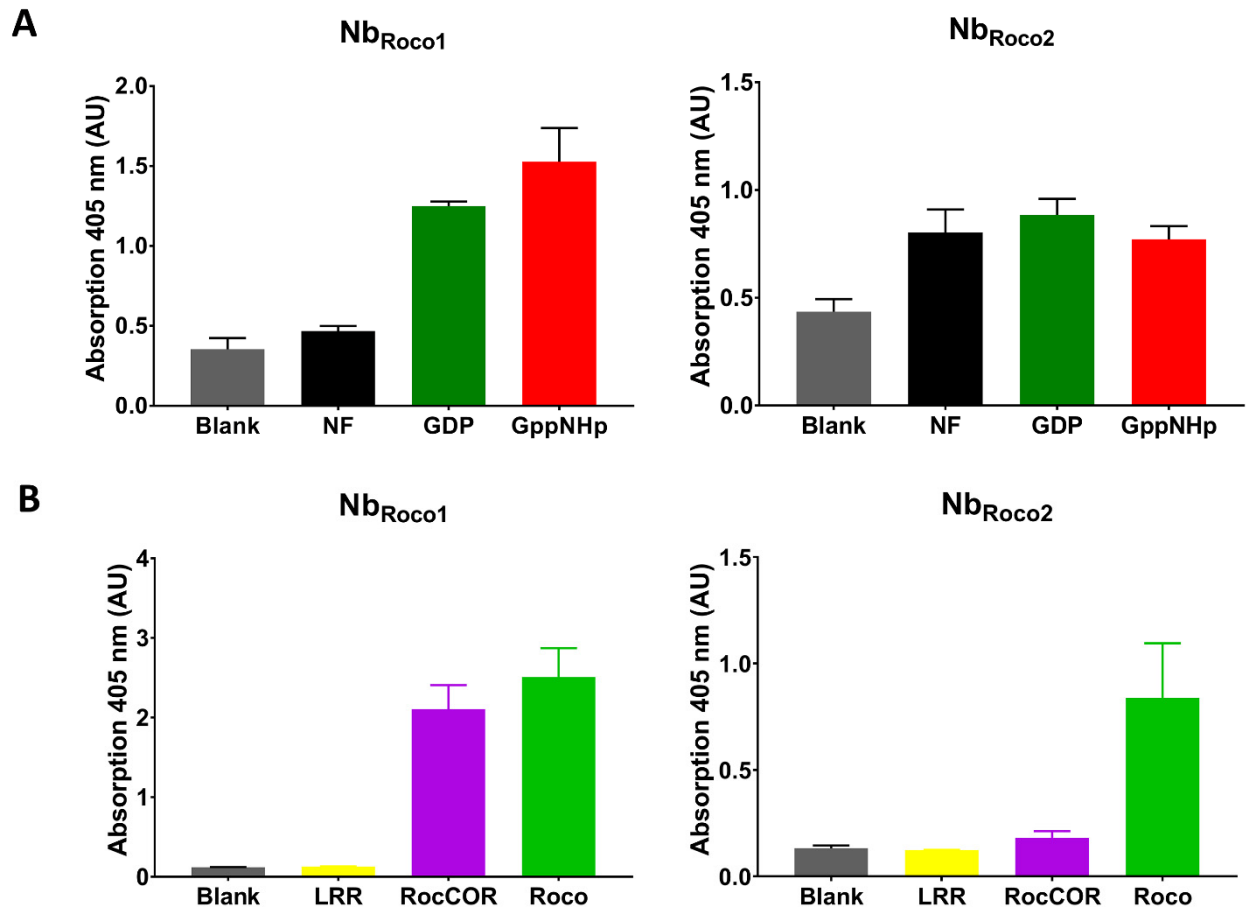

**Supplementary Figure S3. ELISAs to determine the conformational and domain specificity of Nb<sub>Roco1</sub> and Nb<sub>Roco2</sub>.** (A) ELISAs to determine the conformational specificity of Nb<sub>Roco1</sub> and Nb<sub>Roco2</sub> toward CtRoco. The following conditions were used to coat the ELISA plates: Blank: no protein, NF: nucleotide free CtRoco, GDP: GDP-loaded CtRoco, GppNHp: GppNHp-loaded CtRoco. (B) ELISAs to determine the domain specificity of Nb<sub>Roco1</sub> and Nb<sub>Roco2</sub>. The ELISA plates were coated with either CtLRR, CtRocCOR or CtRoco proteins, or no protein as blank. All measurements were done in quintuplicate of which the mean and standard deviations are depicted.

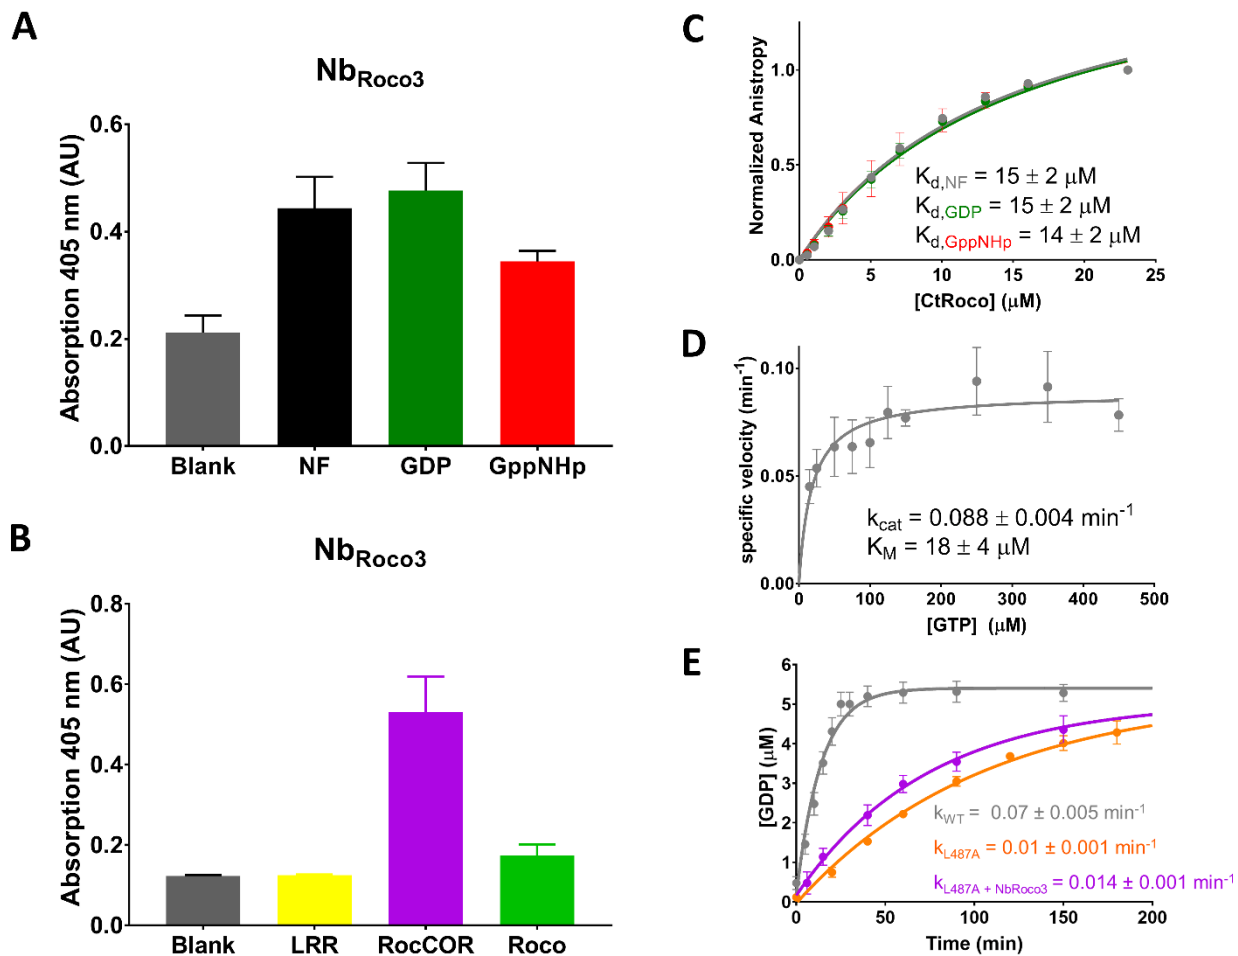

**Supplementary Figure S4: Characterization of Nb<sub>Roco3</sub>.** (A) ELISAs to determine the conformational specificity of Nb<sub>Roco3</sub> toward CtRoco. The following conditions were used to coat the ELISA plates: Blank: no protein, NF: nucleotide free CtRoco, GDP: GDP-loaded CtRoco, GppNHp: GppNHp-loaded CtRoco. All measurements were done in quintuplicate of which the mean and standard deviations are depicted. (B) ELISAs to determine the domain specificity of Nb<sub>Roco3</sub>. The ELISA plates were coated with either CtLRR, CtRocCOR or CtRoco proteins, or no protein as blank. All measurements were done in quintuplicate of which the mean and standard deviations are depicted. (C) Influence of the nucleotide bound state of CtRoco on the affinity for Nb<sub>Roco3</sub> assessed by fluorescence anisotropy titrations. The fluorescence anisotropy signal of the FITC-labelled Nb is monitored upon titration with increasing concentrations of CtRoco in the nucleotide-free state (grey), or bound to GDP (green) or GppNHp (red). The corresponding equilibrium dissociation constants ( $K_d \pm$  standard error) obtained by fitting on a quadratic binding equation are given (each data point is the average of three independent measurements with the error bars representing the standard deviation). (D) Steady state Michaelis-Menten kinetics of CtRoco in the presence of an excess of Nb<sub>Roco3</sub>. The rate of GDP production in function of time was analyzed via reversed-phase HPLC, and specific velocities (initial rate divided by enzyme concentration) were plotted against the GTP

concentration.  $k_{cat}$  and  $K_M$  values ( $\pm$  standard error) resulting from fitting with the Michaelis-Menten equation are shown (each data point is the average of three independent measurements with the error bars representing the standard deviation). **(E)** Effect of  $Nb_{Roco3}$  on the single turnover GTP hydrolysis kinetics of the CtRoco L487A mutant. 5  $\mu$ M of CtRoco (grey) or the CtRoco L487A mutant either in absence (orange) or presence (purple) of an excess of  $Nb_{Roco3}$  was mixed with 5  $\mu$ M of GTP, and production of GDP was followed in time. The observed rate constants ( $k \pm$  standard error) obtained by fitting on a single exponential equation are shown. Each data point is the average of three independent measurements with the error bars representing the standard deviation.

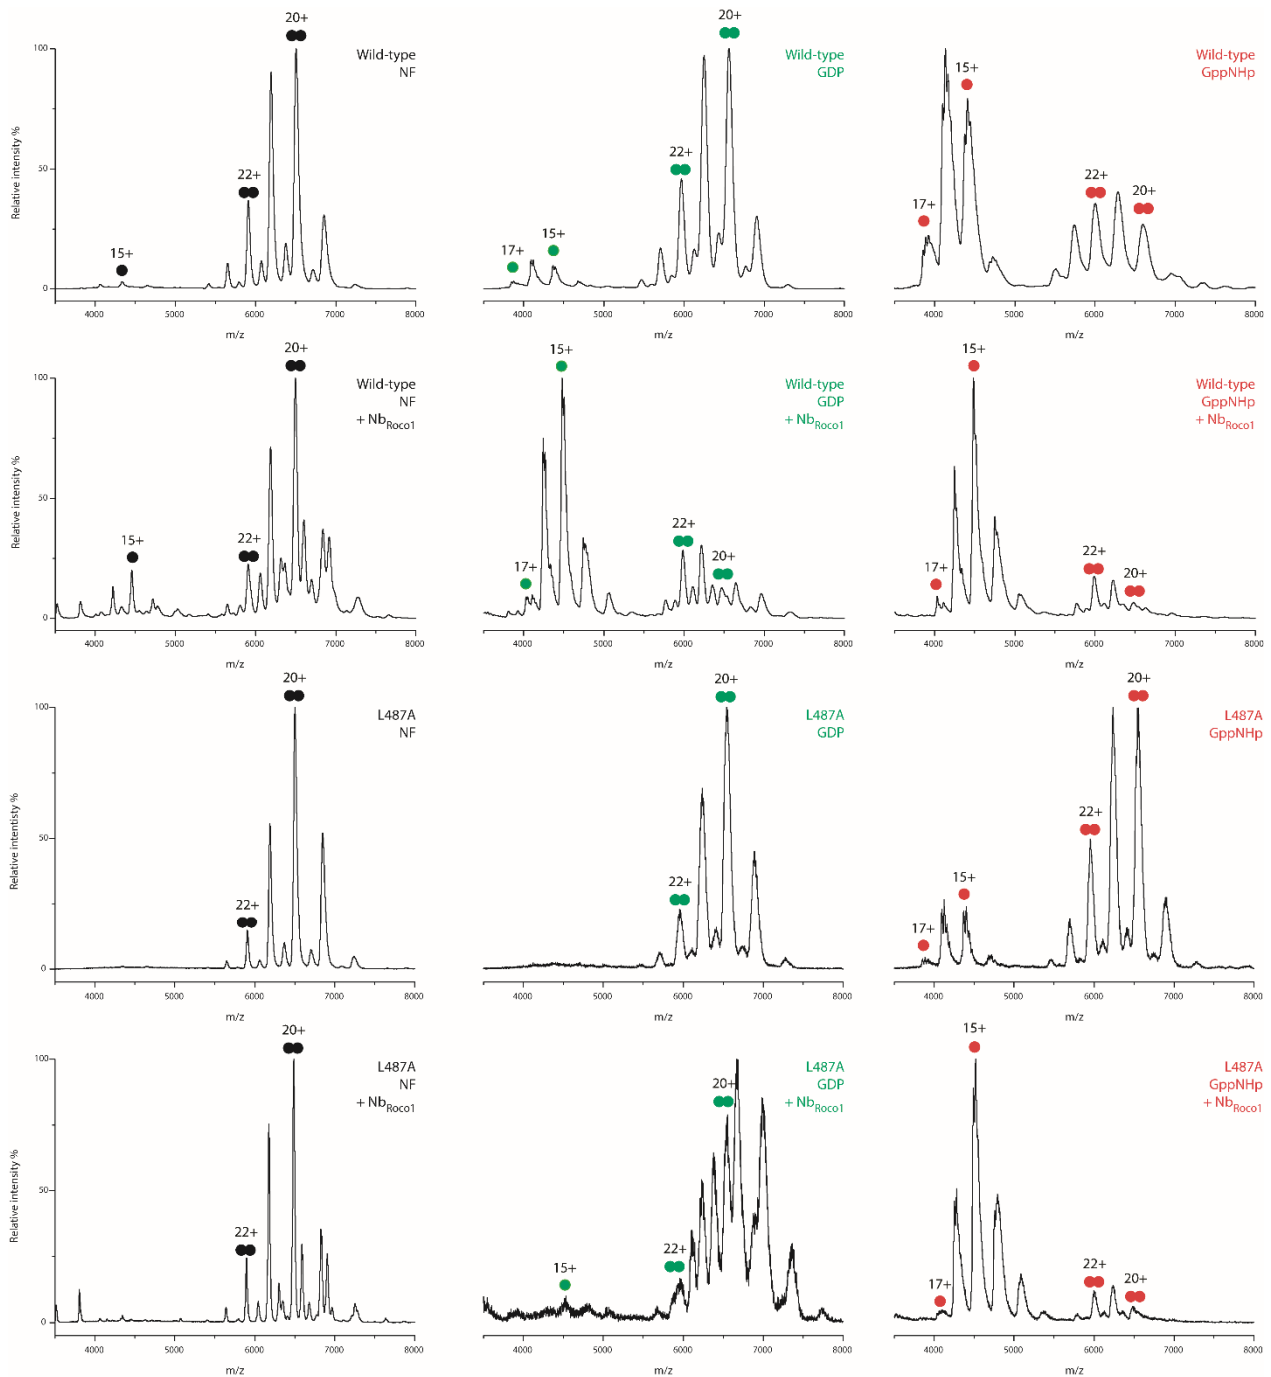

**Supplementary Figure S5:** Native mass spectra of CtRocCOR and the CtRocCOR L487A mutant either in the absence or in the presence of a molar excess of Nb<sub>Roco1</sub> as indicated in each mass spectrum, and for three different nucleotide states: nucleotide free (NF, black), GDP-bound (green) and GppNHp-bound (red). Peaks corresponding to dimeric and monomeric species are labeled with two circles and one circle, respectively.
